# Supplementary material
Source: publisher figshare collection journal article supplement (https://asha.figshare.com/articles/dataset/_/16869479)
Supplement: Supplementary file 1 [file 1]

**Supplemental Material S1.** Detailed information about references from the introduction.

| Author                   | Participants     | Age            | (pre)school-age          | Groups                                                         | Measurement                 | Behavior                                     |
|--------------------------|------------------|----------------|--------------------------|----------------------------------------------------------------|-----------------------------|----------------------------------------------|
| Ambrose et al. 2015      | <i>n</i> = 98    | 2–9-year-old   | preschool-age            | pCWS, rCWS, CWNS                                               | CBQ                         | Temperament                                  |
| Anderson et al. 2003     | <i>n</i> = 62    | 3–5-year-old   | preschool-age            | CWS, CWNS                                                      | BSQ                         | Temperament, and externalizing               |
| Blood et al. 2007        | <i>n</i> = 72    | 10–18-year-old | school-age               | CWS, CWNS                                                      | RCMAS                       | Internalizing                                |
| Davis et al. 2007        | <i>n</i> = 54    | 10–18-year-old | school-age               | pCWS, rCWS, CWNS                                               | STAI                        | Internalizing                                |
| De Nil and Brutten 1991  | <i>n</i> = 341   | 7–14-year-old  | school-age               | CWS, CWNS                                                      | Communication attitude test | Internalizing                                |
| Donaher and Richels 2012 | <i>n</i> = 36    | 3–17-year-old  | preschool and school-age | CWS                                                            | ADHD rating scale           | Externalizing                                |
| Druker et al. 2019       | <i>n</i> = 185   | 2–6-year-old   | preschool-age            | CWS and completed stuttering therapy < 3 months prior to study | ADHD rating scale           | Externalizing                                |
| Eggers et al. 2010       | <i>n</i> = 116   | 3–8-year-old   | preschool-age            | CWS, CWNS                                                      | CBQ                         | Temperament, externalizing and internalizing |
| Embrechts et al. 2000    | <i>n</i> = 76    | 3–8-year-old   | preschool-age            | CWS, CWNS                                                      | CBQ                         | Temperament, externalizing and internalizing |
| Gunn et al. 2014         | <i>n</i> = 37    | 12–17-year-old | school-age               | PWS seeking stuttering treatment                               | Psychometric tests          | Internalizing                                |
| Hollister et al. 2015    | <i>n</i> = 92    | 8–15-year-old  | school-age               | CWS, CWNS                                                      | EATQ-R, HBQ                 | Temperament, externalizing and internalizing |
| Iverach et al. 2016      | <i>n</i> = 225   | 7–12-year-old  | school-age               | CWS, CWNS                                                      | SCAS, SDQ, SMFQ, YODA       | Internalizing                                |
| Iverach et al. 2017      | <i>n</i> = 102   | 11–17-year-old | school-age               | PWS seeking stuttering treatment                               | CBCL, CDI, RCMAS, YSR       | Externalizing                                |
| Karrass et al. 2006      | <i>n</i> = 121   | 3–7-year-old   | preschool-age            | CSW, CWNS                                                      | BSQ                         | Temperament, and externalizing               |
| Kefalianos et al. 2014   | <i>n</i> = 1444  | 2–4-year-old   | preschool-age            | CSW, CWNS                                                      | STS                         | Temperament and internalizing                |
| Kefalianos et al. 2017   | <i>n</i> = 141   | 1–7-year-old   | preschool and school-age | pCWS, rCWS, CWNS                                               | CSBS, SDQ, STS              | Temperament and internalizing                |
| McAllister 2016          | <i>n</i> = 18878 | 3–11-year-old  | preschool and school-age | CWS, CWNS                                                      | SDQ                         | Externalizing and internalizing              |

|                              |                 |               |               |                     |                    |                                   |
|------------------------------|-----------------|---------------|---------------|---------------------|--------------------|-----------------------------------|
| Reilly et al.<br>2009        | <i>n</i> = 1619 | 2–3-year-old  | preschool-age | CWS, CWNS           | CSBS               | Temperament,<br>and internalizing |
| Reilly et al.<br>2013        | <i>n</i> = 1619 | 2–5-year-old  |               | rCWS, pCWS,<br>CWNS | CSBS               | Temperament,<br>and internalizing |
| Rocha et al.<br>2019         | <i>n</i> = 100  | 7–12-year-old | school-age    | CWS, CWNS           | CBQ, MASC,<br>TMCQ | Temperament,<br>and internalizing |
| van der Merwe et al.<br>2011 | <i>n</i> = 14   | 3–4-year-old  | preschool-age | CWS, CWNS           | PAS                | Internalizing                     |

*Note.* ADHD = attention-deficit/hyperactivity disorder; BSQ = Behavior Screening Questionnaire; CBQ = Child Behavior Questionnaire; CDI = Children’s Depression Inventory; CSBS = Communication and Symbolic Behavior Scale; CWS = children who stutter; CWNS = children who do not stutter; EATQ-R = Early Adolescence Temperament Questionnaire–Revised; HBQ = Health and Behavioral Questionnaire; PWS = person who stutters; MASC = Multidimensional Anxiety Scale for Children; PAS = Preschool Anxiety Scale; RCMAS = Revised Children’s Manifest Anxiety Scale; SCAS = Spence Children’s Anxiety Scale; SDQ = Strengths and Difficulties Questionnaire; SMFQ = Short Mood and Feelings Questionnaire; STAI = State-Trait Anxiety Inventory; STS = Short Temperament Scale; TMCQ = Temperament in Middle Childhood Questionnaire; YODA = Youth Online Diagnostic Assessment; YSR = Youth Self Report.
