# Supplementary material
Source: publisher figshare collection journal article supplement (https://asha.figshare.com/articles/dataset/_/16869479)
Supplement: Supplementary file 2 [file 1]

**Supplemental Material S4.** Missing values in covariates in total study sample.

|                                                                    | <b>All participants<br/><i>n</i> = 3,421</b> |
|--------------------------------------------------------------------|----------------------------------------------|
| <b>Participant's characteristics</b>                               | <b><i>n</i> (%) missing values</b>           |
| <b>Child characteristics</b>                                       |                                              |
| Gestational age at birth                                           | 17 (0.5%)                                    |
| Birth weight                                                       | 3 (0.1%)                                     |
| Sex                                                                | na                                           |
| Ethnicity                                                          | 18 (0.5%)                                    |
| Multilingualism                                                    | 57 (1.7%)                                    |
| Intelligence quotient at 6 years                                   | 277 (8.1%)                                   |
| Age at stuttering questionnaire                                    | na                                           |
| Ever had treatment for stuttering                                  | na                                           |
| Ever had treatment for stuttering, speech and/or language problems | na                                           |
| Psychosocial treatment at 9 years                                  | 172 (5.0)                                    |
| <b>Maternal characteristics</b>                                    |                                              |
| Maternal age at intake                                             | na                                           |
| Maternal ethnicity                                                 | 20 (0.6%)                                    |
| Psychopathology score                                              | 766 (22.4%)                                  |
| Maternal education level                                           | 203 (5.9%)                                   |

*Note.* *n* = number, na = not applicable.

Multiple imputation technique was performed in SPSS version 24.0.
