# Supplementary material
Source: publisher figshare collection journal article supplement (https://asha.figshare.com/articles/dataset/_/16869479)
Supplement: Supplementary file 4 [file 1]

**Supplemental Material S5.** Differences between included ( $n = 3,421$ ) and excluded ( $n = 3,466$ ) participants.

|                                          | Participants<br>included<br><i>n</i> = 3,421 |                             |                     | Participants excluded**<br><i>n</i> = 3,466 |                             | <i>p</i> -value<br>of the<br>differe |        |
|------------------------------------------|----------------------------------------------|-----------------------------|---------------------|---------------------------------------------|-----------------------------|--------------------------------------|--------|
| Child characteristics                    |                                              |                             |                     |                                             |                             |                                      |        |
| Gestational age at birth (weeks)         | 39.8                                         | (1.8)                       | [ <i>n</i> = 3,404] | 39.8                                        | (1.8)                       | [ <i>n</i> = 3,433]                  | .52    |
| Birth weight (gram)                      | 3,435                                        | (577)                       | [ <i>n</i> = 3,418] | 3389                                        | (571)                       | [ <i>n</i> = 3,448]                  | < .05* |
| Sex (% boy)                              | 1,670                                        | (48.8%)                     |                     | 1775                                        | (51.2%)                     |                                      | .05    |
| Ethnicity (% Western)                    | 2,659                                        | (78.1%) [ <i>n</i> = 3,403] |                     | 1917                                        | (58.4%) [ <i>n</i> = 3,284] |                                      | < .05* |
| Multilingualism (% yes)                  | 655                                          | (19.5%) [ <i>n</i> = 3,364] |                     | 128                                         | (31.7%) [ <i>n</i> = 404]   |                                      | < .05* |
| Intelligence quotient at 6 years (score) | 104.2                                        | (14.2) [ <i>n</i> = 2,974]  |                     | 98.4                                        | (15.3) [ <i>n</i> = 2,441]  |                                      | < .05* |
| Age at stuttering questionnaire (years)  | 9.8                                          | (0.4)                       |                     | 10.0                                        | (0.4) [ <i>n</i> = 720]     |                                      | < .05* |
| Maternal characteristics                 |                                              |                             |                     |                                             |                             |                                      |        |
| Maternal age at intake (years)           | 31.8                                         | (4.5)                       |                     | 29.8                                        | (5.2)                       |                                      | < .05* |
| Maternal ethnicity (% Western)           | 2,595                                        | (75.9%) [ <i>n</i> = 3,401] |                     | 1791                                        | (51.7%) [ <i>n</i> = 3,275] |                                      | < .05* |
| Psychopathology score                    | 0.2                                          | (0.3) [ <i>n</i> = 2,655]   |                     | 0.3                                         | (0.3) [ <i>n</i> = 2,347]   |                                      | < .05* |
| Maternal education level (% high)        | 2,130                                        | (66.2%) [ <i>n</i> = 3,218] |                     | 1,208                                       | (50.7%) [ <i>n</i> = 2,383] |                                      | < .05* |

*Notes.* For all continuous variables the mean with standard deviation (*SD*) are presented; for categorical variables the  $n$  (%) is presented.

\* $p$ -value < .05.

\*\*Children with missing data on language questionnaire ( $n = 2,746$ ), incomplete data ( $n = 312$ ), undefined speech and language problems ( $n = 398$ ), or missing data on all behavior skill tests ( $n = 10$ ), see Fig. 1.
