# Supplementary material
Source: publisher figshare collection journal article supplement (https://asha.figshare.com/articles/dataset/_/16869479)
Supplement: Supplementary file 5 [file 1]

**Supplemental Material S3.** Correlation between CBCL and IBQ and CBQ.

|                        | IBQ at 0.5 year |                         |        |                       |                        | CBQ at 6 years |                   |                      |          |
|------------------------|-----------------|-------------------------|--------|-----------------------|------------------------|----------------|-------------------|----------------------|----------|
|                        | Activity level  | Distress to limitations | Fear   | Duration of orienting | Recovery from distress | Sadness        | Effortful control | Negative affectivity | Surgency |
| <b>CBCL at 1 year</b>  |                 |                         |        |                       |                        |                |                   |                      |          |
| Externalizing          | .230**          | .237**                  | .121** | -.035                 | -.179**                | .273**         | -.094**           | .253**               | .128**   |
| Internalizing          | .226**          | .202**                  | .272** | .039                  | -.170**                | .283**         | -.014             | .252**               | -.047*   |
| Emotionally reactive   | .230**          | .199**                  | .220** | .041                  | -.154**                | .272**         | .010              | .244**               | .001     |
| <b>CBCL at 3 years</b> |                 |                         |        |                       |                        |                |                   |                      |          |
| Externalizing          | .191**          | .175**                  | .079** | -.016                 | -.156**                | .205**         | -.107**           | .303**               | .160**   |
| Internalizing          | .210**          | .156**                  | .184** | .060**                | -.161**                | .221**         | -.041*            | .301**               | -.110**  |
| Emotionally reactive   | .180**          | .154**                  | .126** | .027                  | -.148**                | .202**         | -.033             | .283**               | -.012    |
| <b>CBCL at 5 years</b> |                 |                         |        |                       |                        |                |                   |                      |          |
| Externalizing          | .117**          | .136**                  | .039   | -.047*                | -.125**                | .168**         | -.183**           | .386**               | .172**   |
| Internalizing          | .106**          | .102**                  | .115** | .024                  | -.100**                | .181**         | -.047*            | .443**               | -.189**  |
| Emotionally reactive   | .096**          | .085**                  | .053*  | .005                  | -.066**                | .131**         | -.050**           | .422**               | -.067**  |
| <b>CBCL at 9 years</b> |                 |                         |        |                       |                        |                |                   |                      |          |
| Externalizing          | .091**          | .128**                  | .002   | -.037                 | -.118**                | .132**         | -.100**           | .267**               | .090**   |
| Internalizing          | .115**          | .110**                  | .124** | -.003                 | -.140**                | .172**         | -.012             | .302**               | -.171**  |
| Emotionally reactive   | .091**          | .112**                  | .039   | .004                  | -.111**                | .140**         | -.028             | .291**               | -.058**  |

*Note.* CBCL = Child Behavior Checklist; CBQ = Child Behavior Questionnaire; IBQ-R = Infant Behavior Questionnaire Revised.

Pearson correlation values were derived from all children with complete information on stuttering at 9 years of age ( $n = 3,421$ ).

\* $p < .05$ . \*\* $p < .01$ .
