# Supplementary material
Source: publisher figshare collection journal article supplement (https://asha.figshare.com/articles/dataset/_/16869479)

**Supplemental Material S2.** Flowchart of subject selection.

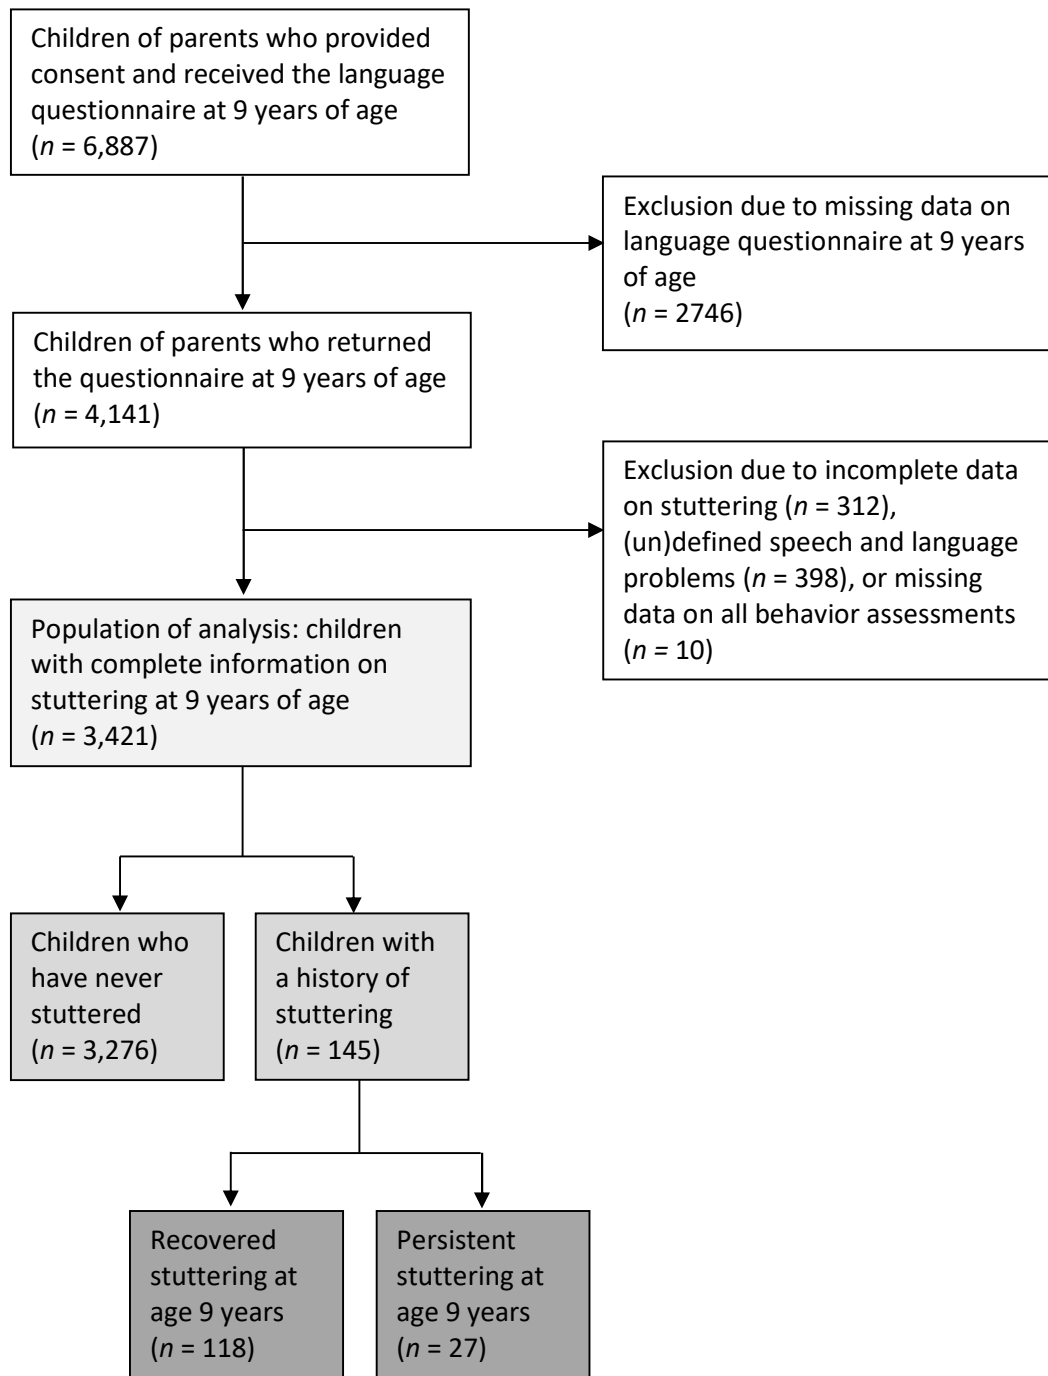

Supplement: Supplementary file 3 [file 1]
